# Supplementary material for: Coordination chemistry of sterically encumbered pyrrolyl ligands to chromium(ii): mono(pyrrolyl)chromium and diazachromocene formation
Source: Royal Society of Chemistry journal article supplement (doi:10.1039/c4dt00533c), 2014-01-01
Supplement: c4dt00533c1.pdf [file c4dt00533c1.pdf]

*Supporting Information for*

**Coordination chemistry of sterically encumbered  
pyrrolyl ligands to chromium(II):  
Mono(pyrrolyl)chromium and diazachromocene  
formation**

*Markus Kreye, Constantin G. Daniliuc, Matthias Freytag, Peter G. Jones, and Marc D. Walter\**

**Table of Contents:**

|                                                                   |           |
|-------------------------------------------------------------------|-----------|
| <b>1. UV/vis Spectroscopy of diazachromocenes</b>                 | <b>S2</b> |
| <b>2. UV/vis Spectroscopy of mono(pyrrolyl)chromium complexes</b> | <b>S3</b> |
| <b>3. Conditions for catalytic testing</b>                        | <b>S5</b> |

## 1. UV/vis Spectroscopy on diazachromocenes

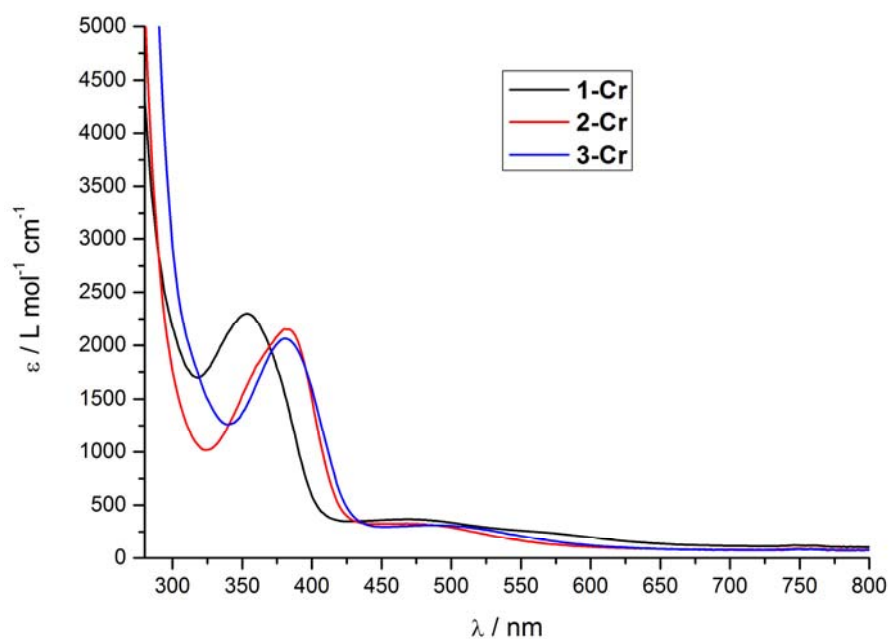

**Figure S1.** UV/vis spectra of **1-Cr**, **2-Cr** and **3-Cr** recorded in hexane at ambient temperature.

**Table S1.** UV-vis spectra of diazachromocenes

| Compound <sup>a</sup> | $\lambda_{\text{max}} / \text{nm} [\epsilon / \text{L mol}^{-1} \text{cm}^{-1}]$ |
|-----------------------|----------------------------------------------------------------------------------|
| <b>1-Cr</b>           | 354 [2300], 470 [370]                                                            |
| <b>2-Cr</b>           | 382 [2150], 470 [325]                                                            |
| <b>3-Cr</b>           | 380 [2060], 488 [310]                                                            |

<sup>a</sup> UV-vis spectra recorded in hexane solution at ambient temperature.

## 2. UV/vis Spectroscopy on mono(pyrrolyl)chromium complexes

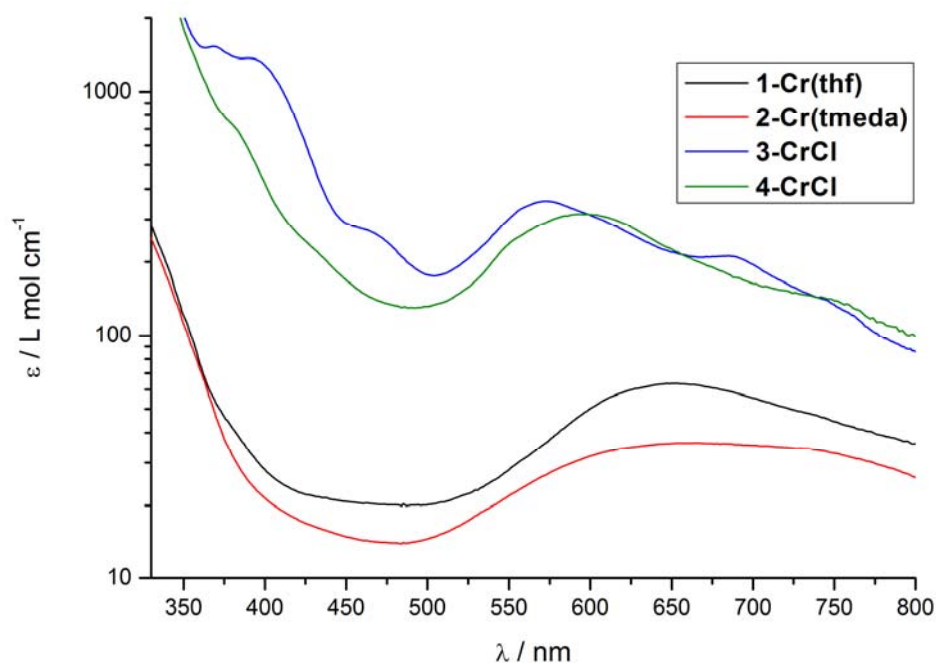

**Figure S2.** UV/vis spectra of **1-Cr(thf)**, **2-Cr(tmeda)**, **3-CrCl** and **4-CrCl** recorded at ambient temperature.

**Table S2.** UV-vis spectra of **1-Cr(thf)**, **2-Cr(tmeda)**, **3-CrCl** and **4-CrCl**<sup>a</sup>

| Compound           | $\lambda_{\max}$ / nm [ $\epsilon$ / L mol <sup>-1</sup> cm <sup>-1</sup> ] | solvent |
|--------------------|-----------------------------------------------------------------------------|---------|
| <b>1-Cr(thf)</b>   | 654 [64]                                                                    | THF     |
| <b>2-Cr(tmeda)</b> | 666 [36]                                                                    | THF     |
| <b>3-CrCl</b>      | 594 [315], 748 [142]                                                        | hexane  |
| <b>4-CrCl</b>      | 368 [1530], 390 [1370], 463 (sh) [270], 573 [357], 684 [212]                | hexane  |

<sup>a</sup> UV-vis spectra recorded at ambient temperature.

### 3. Conditions for catalytic testing

|                             |                                            |          |                                      |          |
|-----------------------------|--------------------------------------------|----------|--------------------------------------|----------|
|                             | Autoklav: 30 bar ethylene   50°C           |          |                                      |          |
|                             | ratio: Cr:Ligand:Cl:Al                     |          | Cr:Ligand:Cl:Al                      |          |
|                             | 1:1:1:100                                  |          | 1:1:3:30                             |          |
|                             | <b>Trial 1 (MAO)</b>                       |          | <b>Trial 2 (TEA)</b>                 |          |
| <b>Complex: 2-Cr(tmeda)</b> |                                            |          |                                      |          |
|                             | Complex:                                   | 12mg     | Complex:                             | 12mg     |
|                             | DoTriMAC:                                  | no       | DoTriMAC:                            | 16mg     |
|                             | MAO (in toluene):<br>(ca. 1.5 mol/L)       | 2,0mL    | TEA (in toluene):<br>(ca. 1.9 mol/L) | 0,5mL    |
|                             | toluene:                                   | ca. 98mL | toluene:                             | ca.100mL |
| <b>Complex: 3-CrCl</b>      |                                            |          |                                      |          |
|                             | Complex:                                   | 10mg     | Complex:                             | 10mg     |
|                             | DoTriMAC:                                  | no       | DoTriMAC:                            | 16mg     |
|                             | MAO (in toluene):<br>(ca. 1.5 mol/L)       | 2,0mL    | TEA (in toluene):<br>(ca. 1.9 mol/L) | 0,5mL    |
|                             | toluene:                                   | ca. 98mL | toluene:                             | ca.100mL |
| <b>Complex: 4-CrCl</b>      |                                            |          |                                      |          |
|                             | Complex:                                   | 10mg     | Complex:                             | 10mg     |
|                             | DoTriMAC:                                  | no       | DoTriMAC:                            | 16mg     |
|                             | MAO (in toluene):<br>(ca. 1.5 mol/L)       | 2,0mL    | TEA (in toluene):<br>(ca. 1.9 mol/L) | 0,5mL    |
|                             | toluene:                                   | ca. 98mL | toluene:                             | ca.100mL |
|                             | DoTriMAC: Dodecyltrimethylammoniumchloride |          |                                      |          |
|                             | MAO: Methylaluminoxane                     |          |                                      |          |
|                             | TEA: Trimethylaluminum                     |          |                                      |          |
